# Supplementary material for: Characteristics and Trends in HIV Testing Among Medicaid Enrollees Diagnosed as Having Schizophrenia
Source: Atypon-hosted journal article supplement (doi:10.1176/appi.ps.20220311), 2023-02-28
Supplement: appi.ps.20220311.ds001.pdf [file appi.ps.20220311.ds001.pdf]

## SUPPLEMENTAL MATERIALS

| <b>Table of Contents</b>                                                                                                                                                                 | <b>Pages</b> |
|------------------------------------------------------------------------------------------------------------------------------------------------------------------------------------------|--------------|
| <b>Supplemental Material, p1:</b> Annotated Bibliography                                                                                                                                 | 2 - 3        |
| <b>Supplemental Material, p2:</b> ICD-9 diagnosis codes and CPT codes                                                                                                                    | 4 - 6        |
| <b>Supplemental Material, p3:</b> HIV Testing Percentage by State                                                                                                                        | 7 - 10       |
| <b>Supplemental Material, p4:</b> Changes in HIV testing among non-dual eligible Medicaid enrollees with schizophrenia from 2002 to 2012                                                 | 11           |
| <b>Supplemental Material, p5:</b> Logistic Regression of HIV testing among Medicaid patients with schizophrenia, 2002 & 2012                                                             | 12           |
| <b>Supplemental Material, p6:</b> Sensitivity analysis: Logistic regression of HIV testing among Medicaid patients with schizophrenia adjusted for any annual medical visit, 2002 & 2012 | 13 - 14      |
| <b>Supplemental Material, p7:</b> Sensitivity Analysis: Adjusted logistic regression of HIV testing among Medicaid patients by schizophrenia status, 2012                                | 15           |

## Supplemental Material, p1: Annotated Bibliography

In this annotated bibliography, we provide more background information on the literature regarding HIV prevalence, HIV risk behaviors, and HIV testing among people with serious mental illness (e.g., schizophrenia, bipolar disorder). For each study, we provide the following information:

- Study design
- Single site vs multi-site
- Setting (inpatient, outpatient)
- US Region
- # of patients
- Year of examination

### HIV Prevalence

- **Cournos F, Empfield M, Horwath E, Kramer M. The management of HIV infection in state psychiatric hospitals. *Psychiatric Services* 1989;40:153-7.** Cross-sectional, multi-site study in New York inpatients (N=15,000) from 1983-1988.
- **Cournos F, Empfield M, Horwath E, Schrage H. HIV infection in state hospitals: case reports and long-term management strategies. *Psychiatric Services* 1990;41:163-6.** Case-report, single-site study in New York inpatient unit (N=5) in 1987.
- **Horwath E, Kramer M, Cournos F, Empfield M, Gewirtz G. Clinical presentations of AIDS and HIV infection in state psychiatric facilities. *Psychiatric Services* 1989;40:502-6.** A review of selected cases of HIV/AIDS presenting among patients at three state psychiatric hospitals in New York City (N=unknown) from 1980-1989.
- **Walkup J, Crystal S, Sambamoorthi U. Schizophrenia and major affective disorder among Medicaid recipients with HIV/AIDS in New Jersey. *American journal of public health* 1999;89:1101-3.** Cross-sectional, multi-site study in New Jersey inpatient and outpatient settings (N=8,294) from 1988-1996.
- **Walkup J, Blank MB, Gonzalez JS, et al. The impact of mental health and substance abuse factors on HIV prevention and treatment. *JAIDS Journal of Acquired Immune Deficiency Syndromes* 2008;47:S15-S9.** A research agenda including US-wide studies of both inpatient and outpatient samples (N=unknown) from the 1980s-2008 .

### HIV Risk Behaviors

- **Morgan EE, Woods SP, Weber E, Dawson MS, Carey CL, Moran LM, et al. HIV-associated episodic memory impairment: evidence of a possible differential deficit in source memory for complex visual stimuli. *J Neuropsychiatry Clin Neurosci.* 2009;21(2):189-98.** Case-control, single-site study in San Diego, California (N=95).
- **Waters FAV, Maybery MT, Badcock JC, Michie PT. Context memory and binding in schizophrenia. *Schizophrenia Research.* 2004;68(2-3):119-25.** Case-control, single-site study in Perth, Western Australia (N=67).

### HIV Testing

- **Walkup, J., McAlpine, D. D., Olsson, M., Boyer, C., & Hansell, S. (2000). Recent HIV testing among general hospital inpatients with schizophrenia: findings from four New York City sites. *The Psychiatric Quarterly*, 71(2), 177–193.** Cross-sectional, multi-site study of New York inpatient settings (N=300) from 1994–1995.
- **Pirl, W. F., Greer, J. A., Weissgarber, C., Liverant, G., & Safren, S. A. (2005). Screening for infectious diseases among patients in a state psychiatric hospital. *Psychiatric services*, 56(12), 1614–1616.** Cross-sectional single-site study in Boston, MA inpatient unit (N=655) from 1997-1999.
- **Goldberg, R. W., Himelhoch, S., Kreyenbuhl, J., Dickerson, F. B., Hackman, A., Fang, L. J., Brown, C. H., Wohlheiter, K. A., & Dixon, L. B. (2005). Predictors of HIV and hepatitis testing and related**

- service utilization among individuals with serious mental illness. *Psychosomatics*, 46(6), 573–577. Cross-sectional multi-site study of Baltimore, MD outpatient settings (N=200) in 2000.
- Desai, M. M., Rosenheck, R. A., & Desai, R. A. (2007). Prevalence and correlates of human immunodeficiency virus testing and posttest counseling among outpatients with serious mental illness. *The Journal of nervous and mental disease*, 195(9), 776–780. Cross-sectional multi-site study of outpatients in Connecticut public-sector facilities (N=487) from 1996-1998.
  - Yehia, B. R., Cui, W., Thompson, W. W., Zack, M. M., McKnight-Eily, L., DiNenno, E., Rose, C. E., & Blank, M. B. (2014). HIV testing among adults with mental illness in the United States. *AIDS patient care and STDs*, 28(12), 628–634. Cross-sectional multi-site study in all 50 states and the District of Columbia (N=21,785) in 2007.
  - Rizza, S. A., MacGowan, R. J., Purcell, D. W., Branson, B. M., & Temesgen, Z. (2012). HIV screening in the health care setting: status, barriers, and potential solutions. *Mayo Clinic Proceedings*, 87(9), 915-924. A review of HIV infection and CDC testing practices in the United States from 1985-2012.
  - Mohajer, M. A., Lyons, M., King, E., Pratt, J., & Fichtenbaum, C. J. (2012). Internal medicine and emergency medicine physicians lack accurate knowledge of current CDC HIV testing recommendations and infrequently offer HIV testing. *Journal of the International Association of Physicians in AIDS Care*, 11(2), 101–108. A cross-sectional electronic survey study with emergency medicine and internal medicine physicians (N=232) in Cincinnati, OH in 2010.
  - Zheng, M. Y., Suneja, A., Chou, A. L., & Arya, M. (2014). Physician barriers to successful implementation of US Preventive Services Task Force routine HIV testing recommendations. *Journal of the International Association of Providers of AIDS Care*, 13(3), 200–205. A review of HIV testing guidelines, physician adherence to HIV testing guidelines, and physician barriers to HIV testing in the United States from 1997-2012.
  - Arya, M., Zheng, M. Y., Amspoker, A. B., Kallen, M. A., Street, R. L., Viswanath, K., & Giordano, T. P. (2014). In the routine HIV testing era, primary care physicians in community health centers remain unaware of HIV testing recommendations. *Journal of the International Association of Providers of AIDS Care*, 13(4), 296–299. A cross-sectional electronic survey study with primary care physicians (N=312) in publicly funded community health centers in Houston, TX in 2013.
  - Knox, M. D., & Clark, C. F. (1991). Early HIV detection: a community mental health role. *Journal of mental health administration*, 18(1), 21–26. A review of the role of community mental health centers in early HIV testing and detection in the United States through 1980s.
  - Knox, M. D., Davis, M., & Friedrich, M. A. (1994). The HIV mental health spectrum. *Community mental health journal*, 30(1), 75–94. A conceptual framework to identify HIV service requirements and training in community mental health centers.
  - Satriano J. (2002) Routine HIV Testing for the Severely Mentally Ill: Considerations and Cautions. *Journal of Psychiatric Practice*, 8(3):143-50. A policy paper on the impact of HIV on those with severe mental illness and changes in mental/public health laws in the United States from 1980s-2000.
  - Walkup J, Satriano J, Barry D, Sadler P, Cournos F. (2002) HIV testing policy and serious mental illness. *American Journal of Public Health*, 92(12):1931-40. A survey study with experts in HIV and severe mental illness (N=28) across the United States in 2002.

**Supplemental Material, p2. ICD-9 diagnosis codes and CPT codes**

| Variable                | ICD-9 Code            | CPT code | Definition                                                                                                                                                                                            |
|-------------------------|-----------------------|----------|-------------------------------------------------------------------------------------------------------------------------------------------------------------------------------------------------------|
| Alcohol Use Disorder    | 303 (with wildcard)   |          | Alcohol dependence syndrome                                                                                                                                                                           |
| Anxiety Disorders       | 300.0 (with wildcard) |          | Anxiety, dissociative and somatoform disorders                                                                                                                                                        |
| Cannabis Use Disorder   | 304.3 (with wildcard) |          | Cannabis dependence                                                                                                                                                                                   |
|                         | 305.2 (with wildcard) |          | Nondependent cannabis abuse                                                                                                                                                                           |
| Chlamydia               | 77.98                 |          | Unspecified diseases of conjunctiva due to chlamydiae                                                                                                                                                 |
|                         | 78.88                 |          | Other specified diseases due to chlamydiae                                                                                                                                                            |
|                         | 79.98                 |          | Unspecified chlamydial infection                                                                                                                                                                      |
|                         | 99.41                 |          | Other nongonococcal urethritis, chlamydia trachomatis                                                                                                                                                 |
|                         | 099.5 (with wildcard) |          | Other venereal diseases due to chlamydia trachomatis                                                                                                                                                  |
| Cocaine Use Disorder    | 304.2 (with wildcard) |          | Cocaine dependence                                                                                                                                                                                    |
|                         | 305.6 (with wildcard) |          | Nondependent cocaine abuse                                                                                                                                                                            |
| Depressive Disorders    | 296.2 (with wildcard) |          | Major depressive disorder single episode                                                                                                                                                              |
|                         | 296.3 (with wildcard) |          | Major depressive disorder recurrent episode                                                                                                                                                           |
|                         | 296.82                |          | Atypical depressive disorder                                                                                                                                                                          |
|                         | 311                   |          | Depressive disorder, not elsewhere classified                                                                                                                                                         |
|                         | 300.4                 |          | Dysthymic disorder                                                                                                                                                                                    |
| Diabetes Mellitus       | 250 (with wildcard)   |          | Diabetes Mellitus                                                                                                                                                                                     |
| Dyslipidemia            | 272 (with wildcard)   |          | Disorders of lipid metabolism                                                                                                                                                                         |
| Gonococcal Infection    | 098 (with wildcard)   |          | Gonococcal infections                                                                                                                                                                                 |
|                         | 647.1 (with wildcard) |          | Gonorrhea complicating pregnancy childbirth or the puerperium                                                                                                                                         |
| Hepatitis B Infection   | 070.2 (with wildcard) |          | Viral Hepatitis B with hepatic coma                                                                                                                                                                   |
|                         | 070.3 (with wildcard) |          | Viral Hepatitis B without mention of hepatic coma                                                                                                                                                     |
|                         | 70.42                 |          | Hepatitis delta without mention of active hepatitis B disease with hepatic coma                                                                                                                       |
|                         | 70.52                 |          | Hepatitis delta without mention of active hepatitis B disease or hepatic coma                                                                                                                         |
|                         | V02.61                |          | Hepatitis B carrier                                                                                                                                                                                   |
| Hepatitis C Infection   | 70.51                 |          | Acute HCV                                                                                                                                                                                             |
|                         | 70.41                 |          | Acute HCV with Hepatic Coma                                                                                                                                                                           |
|                         | V02.62                |          | HCV Carrier Status                                                                                                                                                                                    |
|                         | 70.54                 |          | Chronic HCV (wildcard)                                                                                                                                                                                |
|                         | 70.44                 |          | Chronic HCV with Hepatic Coma                                                                                                                                                                         |
|                         | 70.7                  |          | Unspecified HCV                                                                                                                                                                                       |
|                         | 70.71                 |          | Unspecified HCV with Hepatic Coma                                                                                                                                                                     |
| Herpes Simplex          | 054 (with wildcard)   |          | Herpes Simplex                                                                                                                                                                                        |
| HIV Infection           | 042                   |          | Human immunodeficiency virus [HIV] disease, Acquired immune deficiency syndrome, Acquired immunodeficiency syndrome, AIDS, AIDS-like syndrome, AIDS-related complex, ARC, HIV infection (symptomatic) |
|                         | 079.53                |          | HIV-2 infection                                                                                                                                                                                       |
|                         | V08                   |          | Asymptomatic HIV infection status                                                                                                                                                                     |
|                         | 795.71                |          | Nonspecific serologic evidence of HIV                                                                                                                                                                 |
| Hypertension            | 401 (with wildcard)   |          | Essential hypertension                                                                                                                                                                                |
|                         | 402 (with wildcard)   |          | Hypertensive heart disease                                                                                                                                                                            |
|                         | 403 (with wildcard)   |          | Hypertensive chronic kidney disease                                                                                                                                                                   |
|                         | 404 (with wildcard)   |          | Hypertensive heart and chronic kidney disease                                                                                                                                                         |
|                         | 405 (with wildcard)   |          | Secondary hypertension                                                                                                                                                                                |
| Nondependent Drug Abuse | 305.0 (with wildcard) |          | Nondependent drug abuse                                                                                                                                                                               |
|                         |                       |          |                                                                                                                                                                                                       |
| Opioid Use Disorder     | 304.0 (with wildcard) |          | Opioid type dependence                                                                                                                                                                                |
|                         | 305.5 (with wildcard) |          | Nondependent opioid abuse                                                                                                                                                                             |
| Other Drug Use Disorder | 304.6 (with wildcard) |          | Other, specified drug dependence                                                                                                                                                                      |

|                                           |                       |       |                                                                                                                                                                                                                                                                  |
|-------------------------------------------|-----------------------|-------|------------------------------------------------------------------------------------------------------------------------------------------------------------------------------------------------------------------------------------------------------------------|
|                                           | 304.8 (with wildcard) |       | Combinations excluding opioids                                                                                                                                                                                                                                   |
|                                           | 304.9 (with wildcard) |       | Unspecified drug dependence                                                                                                                                                                                                                                      |
|                                           | 305.9 (with wildcard) |       | Other, mixed or unspecified drug abuse                                                                                                                                                                                                                           |
|                                           | 648.3 (with wildcard) |       | Drug dependence complicating pregnancy, childbirth, or the puerperium                                                                                                                                                                                            |
| Psychosis NOS                             | 298 (with wildcard)   |       | Other nonorganic psychosis                                                                                                                                                                                                                                       |
| Syphilis                                  | 091 (with wildcard)   |       | Early syphilis symptomatic                                                                                                                                                                                                                                       |
|                                           | 092 (with wildcard)   |       | Early syphilis latent                                                                                                                                                                                                                                            |
|                                           | 093 (with wildcard)   |       | Cardiovascular syphilis                                                                                                                                                                                                                                          |
|                                           | 094 (with wildcard)   |       | Neurosyphilis                                                                                                                                                                                                                                                    |
|                                           | 095 (with wildcard)   |       | Other forms of late syphilis with symptoms                                                                                                                                                                                                                       |
|                                           | 096 (with wildcard)   |       | Late syphilis, latent                                                                                                                                                                                                                                            |
|                                           | 097 (with wildcard)   |       | Other and unspecified syphilis                                                                                                                                                                                                                                   |
|                                           | 647.0 (with wildcard) |       | Syphilis complicating pregnancy childbirth or the puerperium                                                                                                                                                                                                     |
| HIV Testing                               |                       | 86311 | HIV antigen testing <sup>13</sup>                                                                                                                                                                                                                                |
|                                           |                       | 86312 | HIV/AIDS testing, but it is specifically "HTLV-III antibody detection, ELISA" <sup>13</sup>                                                                                                                                                                      |
|                                           |                       | 86314 | HIV/AIDS testing, but it is specifically "HTLV-III antibody detection" <sup>13</sup>                                                                                                                                                                             |
|                                           |                       | 86689 | Western Blot for HIV antibody <sup>13-18</sup>                                                                                                                                                                                                                   |
|                                           |                       | 86701 | (HIV-1)                                                                                                                                                                                                                                                          |
|                                           |                       | 86702 | (HIV-2)                                                                                                                                                                                                                                                          |
|                                           |                       | 86703 | HIV Antibodies, HIV-1/HIV-2, EIA with Reflex to HIV-1, Western Blot                                                                                                                                                                                              |
|                                           |                       | 87390 | HIV-1 direct AG (ICD), ELISA                                                                                                                                                                                                                                     |
|                                           |                       | 87391 | HIV-2 antigen                                                                                                                                                                                                                                                    |
|                                           |                       | 87389 | HIV-1 antigen([s], with HIV-1 and HIV-2 antibodies, single result)                                                                                                                                                                                               |
|                                           |                       | 87534 | HIV-1 Nucleic Acid Detection – Direct Probe Technique                                                                                                                                                                                                            |
|                                           |                       | 87535 | HIV-1 Nucleic Acid Detection – Amplified Probe Technique                                                                                                                                                                                                         |
|                                           |                       | 87536 | HIV-1 Nucleic Acid Quantification <sup>13-17</sup>                                                                                                                                                                                                               |
|                                           |                       | 87537 | HIV-2 Nucleic Acid Detection – Direct Probe Technique                                                                                                                                                                                                            |
|                                           |                       | 87538 | HIV-2 Nucleic Acid Detection – Amplified Probe Technique                                                                                                                                                                                                         |
|                                           |                       | 87539 | HIV-2 Nucleic Acid Quantification                                                                                                                                                                                                                                |
|                                           |                       | G0432 | Infectious agent antibody detection by enzyme immunoassay (eia) technique, hiv-1 and/or hiv-2, screening                                                                                                                                                         |
|                                           |                       | G0433 | Infectious agent antigen detection by enzyme-linked immunosorbent assay (ELISA) technique, antibody, HIV-1 or HIV-2, screening                                                                                                                                   |
|                                           |                       | G0435 | Infectious agent antigen detection by rapid antibody test of oral mucosa transudate, HIV-1 or HIV-2, screening.                                                                                                                                                  |
|                                           |                       | S3645 | Hiv-1 antibody testing of oral mucosal transudate                                                                                                                                                                                                                |
| Outpatient Non-psychiatric Medical Visits |                       | 99201 | Office or other outpatient visit for the evaluation and management of a new patient, which requires these three key components: a problem focused history -- a problem focused examination -- and straightforward medical decision making. Counseling and/or co. |
|                                           |                       | 99202 | Office or other outpatient visit for the evaluation and management of a new patient, which requires these three key components: an expanded problem focused history -- an expanded problem focused examination -- and straightforward medical decision making..  |
|                                           |                       | 99203 | Office or other outpatient visit for the evaluation and management of a new patient, which requires these three key components: a detailed history -- a detailed examination -- and medical decision making of low complexity. Counseling and/or coordination o. |
|                                           |                       | 99204 | Office or other outpatient visit for the evaluation and management of a new patient, which requires these three key components: a comprehensive history -- a comprehensive examination -- and medical decision making of moderate complexity. Counseling and/or. |

- 99205 Office or other outpatient visit for the evaluation and management of a new patient, which requires these three key components: a comprehensive history -- a comprehensive examination -- and medical decision making of high complexity. Counseling and/or coo.
- 99211 Office or other outpatient visit for the evaluation and management of an established patient, that may not require the presence of a physician. Usually, the presenting problem(s) are minimal. Typically, 5 minutes are spent performing or supervising these.
- 99212 Office or other outpatient visit for the evaluation and management of an established patient, which requires at least two of these three key components: a problem focused history -- a problem focused examination -- straightforward medical decision making.
- 99213 Office or other outpatient visit for the evaluation and management of an established patient, which requires at least two of these three key components: an expanded problem focused history -- an expanded problem focused examination -- medical decision mak.
- 99214 Office or other outpatient visit for the evaluation and management of an established patient, which requires at least two of these three key components: a detailed history -- a detailed examination -- medical decision making of moderate complexity. Counse.
- 99215 Office or other outpatient visit for the evaluation and management of an established patient, which requires at least two of these three key components: a comprehensive history -- a comprehensive examination -- medical decision making of high complexity..
- 99241 Office consultation for a new or established patient, which requires these three key components: a problem focused history -- a problem focused examination -- and straightforward medical decision making. Counseling and/or coordination of care with other p.
- 99242 Office consultation for a new or established patient, which requires these three key components: an expanded problem focused history -- an expanded problem focused examination -- and straightforward medical decision making. Counseling and/or coordination.
- 99243 Office consultation for a new or established patient, which requires these three key components: a detailed history -- a detailed examination -- and medical decision making of low complexity. Counseling and/or coordination of care with other providers or.
- 99244 Office consultation for a new or established patient, which requires these three key components: a comprehensive history -- a comprehensive examination -- and medical decision making of moderate complexity. Counseling and/or coordination of care with othe.
- 99245 Office consultation for a new or established patient, which requires these three key components: a comprehensive history -- a comprehensive examination -- and medical decision making of high complexity. Counseling and/or coordination of care with other pr.
-

**Supplemental Material, p3. HIV Testing Percentage by State (N = 1,393,161)**

| State       | Cohort        | 2002   |        |       | Adjusted rate<br>(95% CI) | 2012   |         |       | Adjusted rate<br>(95% CI) |
|-------------|---------------|--------|--------|-------|---------------------------|--------|---------|-------|---------------------------|
|             |               | Tested | Total  | %     |                           | Tested | Total   | %     |                           |
| Alaska      | Schizophrenia | 12     | 516    | 2.3%  | 2.3% (1.0, 3.6)           | 13     | 704     | 1.8%  | 1.8% (0.8, 2.8)           |
|             | Control       | 10     | 390    | 2.6%  | 2.8% (1.1, 4.5)           | 7      | 802     | 0.9%  | 0.9% (0.2, 1.5)           |
|             | All           | 22     | 906    | 2.4%  | 3.1% (1.8, 4.5)           | 20     | 1,506   | 1.3%  | 1.6% (0.9, 2.2)           |
| Alabama     | Schizophrenia | 249    | 4,764  | 5.2%  | 5.3% (4.7, 6.0)           | 614    | 6,658   | 9.2%  | 9.8% (9.0, 10.5)          |
|             | Control       | 182    | 4,689  | 3.9%  | 3.7% (3.2, 4.2)           | 763    | 6,510   | 11.7% | 11.3% (10.6, 12.0)        |
|             | All           | 431    | 9,453  | 4.6%  | 3.8% (3.4, 4.1)           | 1,377  | 13,168  | 10.5% | 9.2% (8.7, 9.6)           |
| Arkansas    | Schizophrenia | 164    | 2,515  | 6.5%  | 6.5% (5.6, 7.5)           | 301    | 3,736   | 8.1%  | 8.4% (7.5, 9.2)           |
|             | Control       | 377    | 3,006  | 12.5% | 11.9% (10.8, 13.0)        | 276    | 3,267   | 8.4%  | 8.5% (7.6, 9.4)           |
|             | All           | 541    | 5,521  | 9.8%  | 8.9% (8.2, 9.6)           | 577    | 7,003   | 8.2%  | 7.9% (7.3, 8.5)           |
| California  | Schizophrenia | 2,770  | 42,646 | 6.5%  | 6.9% (6.6, 7.1)           | 4,106  | 58,362  | 7.0%  | 7.5% (7.3, 7.8)           |
|             | Control       | 2,694  | 55,841 | 4.8%  | 4.7% (4.5, 4.8)           | 7,802  | 70,649  | 11.0% | 10.4% (10.2, 10.6)        |
|             | All           | 5,464  | 98,487 | 5.5%  | 5.7% (5.5, 5.8)           | 12,000 | 129,011 | 9.2%  | 9.3% (9.1, 9.4)           |
| Colorado    | Schizophrenia | 21     | 858    | 2.4%  | 2.7% (1.6, 3.9)           | 90     | 1,750   | 5.1%  | 5.6% (4.5, 6.7)           |
|             | Control       | 35     | 1,625  | 2.2%  | 2.2% (1.5, 3.0)           | 162    | 5,100   | 3.2%  | 3.0% (2.5, 3.5)           |
|             | All           | 56     | 2,483  | 2.3%  | 2.6% (1.9, 3.3)           | 252    | 6,850   | 3.7%  | 4.4% (3.8, 5.0)           |
| Connecticut | Schizophrenia | 187    | 2,921  | 6.4%  | 6.4% (5.6, 7.3)           | 849    | 4,808   | 17.7% | 17.2% (16.1, 18.2)        |
|             | Control       | 41     | 3,186  | 1.3%  | 1.2% (0.9, 1.6)           | 1,009  | 9,007   | 11.2% | 11.5% (10.9, 12.2)        |
|             | All           | 228    | 6,107  | 3.7%  | 3.5% (3.1, 3.9)           | 1,858  | 13,815  | 13.4% | 14.0% (13.4, 14.6)        |
| Florida     | Schizophrenia | 1,235  | 14,279 | 8.6%  | 9.0% (8.5, 9.4)           | 1,669  | 18,301  | 9.1%  | 9.6% (9.2, 10.0)          |
|             | Control       | 545    | 11,350 | 4.8%  | 4.6% (4.2, 4.9)           | 1,902  | 20,534  | 9.3%  | 8.9% (8.5, 9.3)           |
|             | All           | 1,780  | 25,629 | 6.9%  | 6.1% (5.9, 6.4)           | 3,571  | 38,835  | 9.2%  | 8.7% (8.5, 9.0)           |
| Georgia     | Schizophrenia | 12     | 7,286  | 0.2%  | 0.2% (0.1, 0.3)           | 71     | 12,719  | 0.6%  | 0.6% (0.4, 0.7)           |
|             | Control       | 14     | 6,143  | 0.2%  | 0.2% (0.1, 0.4)           | 82     | 9,956   | 0.8%  | 0.8% (0.6, 1.0)           |
|             | All           | 26     | 13,429 | 0.2%  | 0.2% (0.1, 0.2)           | 153    | 22,675  | 0.7%  | 0.6% (0.5, 0.7)           |
| Hawaii      | Schizophrenia | 43     | 1,491  | 2.9%  | 2.8% (2.0, 3.7)           | 15     | 2,597   | 0.6%  | 0.6% (0.3, 0.9)           |
|             | Control       | 34     | 1,647  | 2.1%  | 2.0% (1.3, 2.6)           | 16     | 2,924   | 0.5%  | 0.6% (0.3, 0.8)           |
|             | All           | 77     | 3,138  | 2.5%  | 3.6% (2.8, 4.3)           | 31     | 5,521   | 0.6%  | 0.9% (0.6, 1.2)           |
| Iowa        | Schizophrenia | 29     | 856    | 3.4%  | 3.5% (2.3, 4.7)           | 144    | 2,624   | 5.5%  | 5.4% (4.6, 6.3)           |
|             | Control       | 38     | 1,793  | 2.1%  | 2.2% (1.5, 2.8)           | 157    | 5,419   | 2.9%  | 2.9% (2.4, 3.3)           |
|             | All           | 67     | 2,649  | 2.5%  | 3.1% (2.4, 3.9)           | 301    | 8,043   | 3.7%  | 4.5% (4.0, 5.0)           |
| Idaho       | Schizophrenia | 54     | 898    | 6.0%  | 5.7% (4.3, 7.2)           | 73     | 1,612   | 4.5%  | 4.5% (3.5, 5.5)           |
|             | Control       | 27     | 652    | 4.1%  | 4.1% (2.6, 5.6)           | 36     | 1,047   | 3.4%  | 3.6% (2.5, 4.8)           |
|             | All           | 81     | 1,550  | 5.2%  | 6.0% (4.7, 7.2)           | 109    | 2,659   | 4.1%  | 5.0% (4.0, 5.9)           |
| Illinois    | Schizophrenia | 517    | 13,836 | 3.7%  | 3.8% (3.5, 4.1)           | 2,220  | 18,602  | 11.9% | 12.5% (12.0, 13.0)        |
|             | Control       | 179    | 10,199 | 1.8%  | 1.6% (1.4, 1.9)           | 1,564  | 25,418  | 6.2%  | 6.0% (5.8, 6.3)           |

|               |               |     |        |      |                 |       |        |       |                    |
|---------------|---------------|-----|--------|------|-----------------|-------|--------|-------|--------------------|
|               | All           | 696 | 24,035 | 2.9% | 2.4% (2.2, 2.5) | 3,784 | 44,020 | 8.6%  | 8.2% (7.9, 8.4)    |
| Indiana       | Schizophrenia | 159 | 4,049  | 3.9% | 3.8% (3.3, 4.4) | 313   | 5,950  | 5.3%  | 5.2% (4.7, 5.8)    |
|               | Control       | 124 | 3,666  | 3.4% | 3.3% (2.7, 3.8) | 346   | 7,150  | 4.8%  | 5.0% (4.5, 5.5)    |
|               | All           | 283 | 7,715  | 3.7% | 3.7% (3.3, 4.2) | 659   | 13,100 | 5.0%  | 5.4% (5.1, 5.8)    |
| Kansas        | Schizophrenia | 57  | 1,464  | 3.9% | 3.8% (2.9, 4.8) | 95    | 2,003  | 4.7%  | 4.6% (3.7, 5.5)    |
|               | Control       | 33  | 1,160  | 2.8% | 2.9% (1.9, 3.9) | 91    | 1,811  | 5.0%  | 5.2% (4.1, 6.2)    |
|               | All           | 90  | 2,624  | 3.4% | 3.6% (2.8, 4.3) | 186   | 3,814  | 4.9%  | 5.3% (4.6, 6.1)    |
| Kentucky      | Schizophrenia | 164 | 4,055  | 4.0% | 3.7% (3.1, 4.2) | 238   | 5,188  | 4.6%  | 4.4% (3.8, 4.9)    |
|               | Control       | 149 | 6,095  | 2.4% | 2.5% (2.1, 2.9) | 213   | 5,870  | 3.6%  | 4.0% (3.5, 4.5)    |
|               | All           | 313 | 10,150 | 3.1% | 3.8% (3.4, 4.2) | 451   | 11,058 | 4.1%  | 5.2% (4.8, 5.7)    |
| Louisiana     | Schizophrenia | 315 | 5,687  | 5.5% | 5.5% (4.9, 6.1) | 703   | 8,051  | 8.7%  | 8.8% (8.2, 9.4)    |
|               | Control       | 253 | 5,016  | 5.0% | 5.2% (4.6, 5.8) | 800   | 11,568 | 6.9%  | 6.8% (6.4, 7.3)    |
|               | All           | 568 | 10,703 | 5.3% | 4.6% (4.3, 5.0) | 1,503 | 19,619 | 7.7%  | 6.7% (6.4, 7.1)    |
| Massachusetts | Schizophrenia | 99  | 3,085  | 3.2% | 3.4% (2.7, 4.0) | 773   | 7,842  | 9.9%  | 9.8% (9.1, 10.4)   |
|               | Control       | 347 | 12,548 | 2.8% | 2.8% (2.5, 3.1) | 1,189 | 18,908 | 6.3%  | 6.2% (5.9, 6.6)    |
|               | All           | 446 | 15,633 | 2.9% | 3.6% (3.2, 4.0) | 1,962 | 26,750 | 7.3%  | 9.0% (8.6, 9.4)    |
| Maryland      | Schizophrenia | 19  | 5,212  | 0.4% | 0.4% (0.2, 0.5) | 106   | 7,545  | 1.4%  | 1.4% (1.2, 1.7)    |
|               | Control       | 49  | 4,346  | 1.1% | 1.0% (0.7, 1.3) | 104   | 13,947 | 0.7%  | 0.8% (0.6, 0.9)    |
|               | All           | 68  | 9,558  | 0.7% | 0.6% (0.5, 0.8) | 210   | 21,492 | 1.0%  | 0.9% (0.8, 1.0)    |
| Maine         | Schizophrenia | 57  | 1,052  | 5.4% | 5.2% (3.9, 6.5) | 56    | 1,409  | 4.0%  | 3.9% (2.9, 4.9)    |
|               | Control       | 55  | 4,070  | 1.4% | 1.4% (1.0, 1.7) | 70    | 4,062  | 1.7%  | 1.7% (1.3, 2.1)    |
|               | All           | 112 | 5,122  | 2.2% | 4.0% (3.2, 4.8) | 126   | 5,471  | 2.3%  | 3.6% (2.9, 4.2)    |
| Michigan      | Schizophrenia | 5   | 1,052  | 0.5% | 0.5% (0.1, 0.9) | 1,467 | 15,926 | 9.2%  | 8.8% (8.3, 9.2)    |
|               | Control       | 16  | 10,252 | 0.2% | 0.2% (0.1, 0.2) | 1,021 | 17,586 | 5.8%  | 6.1% (5.7, 6.4)    |
|               | All           | 21  | 11,304 | 0.2% | 0.3% (0.1, 0.5) | 2,488 | 33,512 | 7.4%  | 7.1% (6.8, 7.4)    |
| Minnesota     | Schizophrenia | 178 | 3,153  | 5.6% | 5.8% (5.0, 6.6) | 812   | 6,731  | 12.1% | 11.1% (10.4, 11.8) |
|               | Control       | 145 | 3,808  | 3.8% | 3.7% (3.2, 4.3) | 960   | 13,180 | 7.3%  | 7.6% (7.2, 8.1)    |
|               | All           | 323 | 6,961  | 4.6% | 5.1% (4.5, 5.6) | 1,772 | 19,911 | 8.9%  | 9.9% (9.4, 10.3)   |
| Missouri      | Schizophrenia | 226 | 5,730  | 3.9% | 3.8% (3.3, 4.3) | 811   | 9,249  | 8.8%  | 8.8% (8.2, 9.3)    |
|               | Control       | 226 | 8,633  | 2.6% | 2.6% (2.3, 3.0) | 462   | 6,637  | 7.0%  | 7.1% (6.5, 7.7)    |
|               | All           | 452 | 14,363 | 3.1% | 3.2% (2.9, 3.5) | 1,273 | 15,886 | 8.0%  | 7.9% (7.5, 8.3)    |
| Mississippi   | Schizophrenia | 207 | 4,085  | 5.1% | 4.8% (4.1, 5.4) | 405   | 5,264  | 7.7%  | 7.7% (7.0, 8.4)    |
|               | Control       | 168 | 3,624  | 4.6% | 4.7% (4.0, 5.4) | 365   | 4,343  | 8.4%  | 8.8% (8.0, 9.6)    |
|               | All           | 375 | 7,709  | 4.9% | 4.0% (3.6, 4.4) | 770   | 9,607  | 8.0%  | 7.1% (6.6, 7.6)    |
| Montana       | Schizophrenia | 16  | 561    | 2.9% | 2.7% (1.4, 4.0) | 24    | 928    | 2.6%  | 2.6% (1.6, 3.6)    |
|               | Control       | 9   | 546    | 1.6% | 1.6% (0.6, 2.6) | 5     | 572    | 0.9%  | 1.0% (0.1, 1.8)    |
|               | All           | 25  | 1,107  | 2.3% | 2.8% (1.7, 3.9) | 29    | 1,500  | 1.9%  | 2.2% (1.4, 3.1)    |



|                |               |       |        |      |                 |        |         |       |                    |
|----------------|---------------|-------|--------|------|-----------------|--------|---------|-------|--------------------|
| North Carolina | Schizophrenia | 234   | 6,149  | 3.8% | 3.8% (3.3, 4.3) | 1,437  | 10,946  | 13.1% | 12.7% (12.1, 13.3) |
|                | Control       | 312   | 7,385  | 4.2% | 4.3% (3.8, 4.8) | 1,132  | 11,197  | 10.1% | 10.3% (9.8, 10.9)  |
|                | All           | 546   | 13,534 | 4.0% | 3.6% (3.3, 3.9) | 2,569  | 22,143  | 11.6% | 10.1% (9.7, 10.5)  |
| North Dakota   | Schizophrenia | 0     | 161    | 0.0% | 0.0% (0.0, 0.0) | 1      | 292     | 0.3%  | 0.4% (-0.4, 1.2)   |
|                | Control       | 0     | 422    | 0.0% | 0.0% (0.0, 0.0) | 2      | 291     | 0.7%  | 0.6% (-0.2, 1.4)   |
|                | All           | 0     | 583    | 0.0% | 0.0% (0.0, 0.0) | 3      | 583     | 0.5%  | 0.6% (-0.1, 1.3)   |
| Nebraska       | Schizophrenia | 37    | 1,047  | 3.5% | 3.5% (2.4, 4.7) | 72     | 1,550   | 4.6%  | 4.7% (3.6, 5.8)    |
|                | Control       | 27    | 1,117  | 2.4% | 2.3% (1.5, 3.2) | 44     | 999     | 4.4%  | 4.4% (3.2, 5.7)    |
|                | All           | 64    | 2,164  | 3.0% | 3.0% (2.3, 3.7) | 116    | 2,549   | 4.6%  | 4.7% (3.9, 5.6)    |
| New Hampshire  | Schizophrenia | 18    | 465    | 3.9% | 3.9% (2.1, 5.6) | 29     | 566     | 5.1%  | 5.3% (3.4, 7.1)    |
|                | Control       | 22    | 422    | 5.2% | 4.9% (2.9, 6.9) | 47     | 656     | 7.2%  | 7.3% (5.3, 9.3)    |
|                | All           | 40    | 887    | 4.5% | 5.7% (4.0, 7.4) | 76     | 1,222   | 6.2%  | 8.1% (6.4, 9.8)    |
| New Jersey     | Schizophrenia | 409   | 6,626  | 6.2% | 6.1% (5.5, 6.7) | 967    | 9,345   | 10.3% | 10.4% (9.8, 11.1)  |
|                | Control       | 295   | 6,484  | 4.5% | 4.5% (4.0, 5.0) | 1,199  | 13,154  | 9.1%  | 9.2% (8.7, 9.6)    |
|                | All           | 704   | 13,110 | 5.4% | 5.1% (4.7, 5.5) | 2,166  | 22,499  | 9.6%  | 9.6% (9.2, 9.9)    |
| New Mexico     | Schizophrenia | 75    | 1,522  | 4.9% | 4.9% (3.8, 5.9) | 152    | 2,608   | 5.8%  | 5.6% (4.7, 6.4)    |
|                | Control       | 32    | 1,498  | 2.1% | 2.1% (1.4, 2.8) | 123    | 3,327   | 3.7%  | 3.9% (3.2, 4.6)    |
|                | All           | 107   | 3,020  | 3.5% | 3.6% (2.9, 4.3) | 275    | 5,935   | 4.6%  | 5.1% (4.5, 5.7)    |
| New York       | Schizophrenia | 1,302 | 33,711 | 3.9% | 3.7% (3.5, 3.9) | 5,870  | 45,528  | 12.9% | 12.7% (12.4, 13.0) |
|                | Control       | 1,041 | 32,452 | 3.2% | 3.3% (3.1, 3.5) | 6,042  | 74,085  | 8.2%  | 8.4% (8.2, 8.6)    |
|                | All           | 2,343 | 66,163 | 3.5% | 3.5% (3.3, 3.6) | 12,000 | 119,613 | 10.0% | 10.3% (10.1, 10.5) |
| Ohio           | Schizophrenia | 467   | 11,174 | 4.2% | 4.1% (3.8, 4.5) | 1,411  | 17,354  | 8.1%  | 8.0% (7.6, 8.4)    |
|                | Control       | 343   | 12,857 | 2.7% | 2.6% (2.4, 2.9) | 1,168  | 23,444  | 5.0%  | 5.1% (4.8, 5.4)    |
|                | All           | 810   | 24,031 | 3.4% | 3.3% (3.1, 3.5) | 2,579  | 40,798  | 6.3%  | 6.4% (6.2, 6.7)    |
| Oklahoma       | Schizophrenia | 34    | 2,598  | 1.3% | 1.4% (0.9, 1.8) | 162    | 4,941   | 3.3%  | 3.3% (2.8, 3.8)    |
|                | Control       | 69    | 2,150  | 3.2% | 3.2% (2.5, 4.0) | 133    | 5,328   | 2.5%  | 2.4% (2.0, 2.8)    |
|                | All           | 103   | 4,748  | 2.2% | 2.6% (2.1, 3.1) | 295    | 10,269  | 2.9%  | 3.0% (2.7, 3.4)    |
| Pennsylvania   | Schizophrenia | 112   | 3,756  | 3.0% | 3.3% (2.7, 3.9) | 188    | 5,136   | 3.7%  | 3.8% (3.3, 4.4)    |
|                | Control       | 89    | 14,480 | 0.6% | 0.6% (0.5, 0.7) | 483    | 22,147  | 2.2%  | 2.1% (1.9, 2.3)    |
|                | All           | 201   | 18,236 | 1.1% | 1.9% (1.6, 2.2) | 671    | 27,283  | 2.5%  | 3.0% (2.8, 3.3)    |
| South Carolina | Schizophrenia | 203   | 4,056  | 5.0% | 5.1% (4.4, 5.8) | 309    | 4,814   | 6.4%  | 6.9% (6.2, 7.7)    |
|                | Control       | 261   | 6,166  | 4.2% | 3.9% (3.4, 4.3) | 420    | 7,257   | 5.8%  | 5.9% (5.3, 6.4)    |
|                | All           | 464   | 10,222 | 4.5% | 3.7% (3.4, 4.1) | 729    | 12,071  | 6.0%  | 5.4% (5.0, 5.8)    |
| South Dakota   | Schizophrenia | 9     | 303    | 3.0% | 3.0% (1.1, 4.9) | 9      | 470     | 1.9%  | 1.9% (0.7, 3.1)    |
|                | Control       | 6     | 397    | 1.5% | 1.5% (0.3, 2.6) | 15     | 478     | 3.1%  | 3.2% (1.6, 4.8)    |
|                | All           | 15    | 700    | 2.1% | 2.6% (1.3, 3.9) | 24     | 948     | 2.5%  | 3.2% (2.0, 4.5)    |
| Tennessee      | Schizophrenia | 131   | 5,124  | 2.6% | 2.3% (1.9, 2.7) | 631    | 7,646   | 8.3%  | 7.5% (6.9, 8.1)    |
|                | Control       | 354   | 24,787 | 1.4% | 1.6% (1.4, 1.7) | 639    | 9,768   | 6.5%  | 6.1% (5.7, 6.6)    |

|               |               |        |         |      |                  |        |         |       |                  |
|---------------|---------------|--------|---------|------|------------------|--------|---------|-------|------------------|
|               | All           | 485    | 29,911  | 1.6% | 2.0% (1.8, 2.2)  | 1,270  | 17,414  | 7.3%  | 7.2% (6.8, 7.5)  |
| Texas         | Schizophrenia | 583    | 11,932  | 4.9% | 4.8% (4.4, 5.2)  | 1,932  | 23,683  | 8.2%  | 8.1% (7.7, 8.4)  |
|               | Control       | 314    | 8,751   | 3.6% | 3.8% (3.4, 4.2)  | 1,151  | 13,686  | 8.4%  | 8.5% (8.0, 8.9)  |
|               | All           | 897    | 20,683  | 4.3% | 4.1% (3.8, 4.4)  | 3,083  | 37,369  | 8.3%  | 8.1% (7.8, 8.4)  |
| Utah          | Schizophrenia | 4      | 169     | 2.4% | 2.5% (0.1, 5.0)  | 34     | 1,205   | 2.8%  | 2.9% (1.9, 3.8)  |
|               | Control       | 15     | 771     | 1.9% | 1.9% (1.0, 2.9)  | 78     | 2,040   | 3.8%  | 3.8% (3.0, 4.6)  |
|               | All           | 19     | 940     | 2.0% | 2.7% (1.2, 4.1)  | 112    | 3,245   | 3.5%  | 4.1% (3.4, 4.8)  |
| Virginia      | Schizophrenia | 136    | 4,610   | 3.0% | 3.1% (2.6, 3.6)  | 544    | 7,480   | 7.3%  | 7.1% (6.6, 7.7)  |
|               | Control       | 101    | 3,291   | 3.1% | 3.2% (2.6, 3.9)  | 369    | 6,810   | 5.4%  | 5.2% (4.7, 5.7)  |
|               | All           | 237    | 7,901   | 3.0% | 2.9% (2.5, 3.3)  | 913    | 14,290  | 6.4%  | 5.5% (5.2, 5.9)  |
| Vermont       | Schizophrenia | 7      | 184     | 3.8% | 3.5% (1.0, 6.0)  | 44     | 402     | 10.9% | 10.2% (7.4, 13)  |
|               | Control       | 33     | 1,451   | 2.3% | 2.2% (1.5, 3.0)  | 130    | 2,678   | 4.9%  | 5.0% (4.2, 5.8)  |
|               | All           | 40     | 1,635   | 2.4% | 3.8% (2.3, 5.4)  | 174    | 3,080   | 5.6%  | 9.7% (8.0, 11.3) |
| Washington    | Schizophrenia | 184    | 3,270   | 5.6% | 5.8% (5.0, 6.6)  | 241    | 6,963   | 3.5%  | 3.5% (3.1, 4.0)  |
|               | Control       | 189    | 5,615   | 3.4% | 3.3% (2.8, 3.8)  | 292    | 7,085   | 4.1%  | 4.0% (3.6, 4.5)  |
|               | All           | 373    | 8,885   | 4.2% | 5.1% (4.6, 5.6)  | 533    | 14,048  | 3.8%  | 4.5% (4.1, 4.9)  |
| Wisconsin     | Schizophrenia | 133    | 3,730   | 3.6% | 3.7% (3.1, 4.3)  | 572    | 5,557   | 10.3% | 9.8% (9.0, 10.5) |
|               | Control       | 146    | 5,425   | 2.7% | 2.6% (2.2, 3.0)  | 596    | 11,985  | 5.0%  | 5.1% (4.7, 5.5)  |
|               | All           | 279    | 9,155   | 3.0% | 3.3% (2.9, 3.7)  | 1,168  | 17,542  | 6.7%  | 7.5% (7.1, 8.0)  |
| West Virginia | Schizophrenia | 62     | 2,272   | 2.7% | 2.5% (1.9, 3.1)  | 87     | 2,997   | 2.9%  | 2.7% (2.2, 3.3)  |
|               | Control       | 55     | 3,101   | 1.8% | 1.8% (1.3, 2.3)  | 50     | 3,324   | 1.5%  | 1.7% (1.2, 2.2)  |
|               | All           | 117    | 5,373   | 2.2% | 3.0% (2.4, 3.5)  | 137    | 6,321   | 2.2%  | 3.0% (2.5, 3.5)  |
| Wyoming       | Schizophrenia | 7      | 156     | 4.5% | 4.4% (1.2, 7.5)  | 12     | 232     | 5.2%  | 4.9% (2.3, 7.6)  |
|               | Control       | 3      | 199     | 1.5% | 1.6% (-0.2, 3.4) | 12     | 309     | 3.9%  | 3.9% (1.8, 6.0)  |
|               | All           | 10     | 355     | 2.8% | 3.4% (1.3, 5.4)  | 24     | 541     | 4.4%  | 5.2% (3.2, 7.1)  |
| USA (Total)   | Schizophrenia | 11,048 | 235,066 | 4.7% | 4.7% (4.6, 4.7)  | 30,566 | 368,274 | 8.3%  | 8.3% (8.2, 8.4)  |
|               | Control       | 9,409  | 303,506 | 3.1% | 3.1% (3.1, 3.2)  | 33,556 | 486,315 | 6.9%  | 6.9% (6.8, 7.0)  |
|               | All           | 20,457 | 538,572 | 3.8% | 3.8% (3.7, 3.8)  | 64,123 | 854,589 | 7.5%  | 7.5% (7.5, 7.6)  |

*Note: Rate estimates are adjusted for age, sex, and race/ethnicity; CI = confidence interval.*

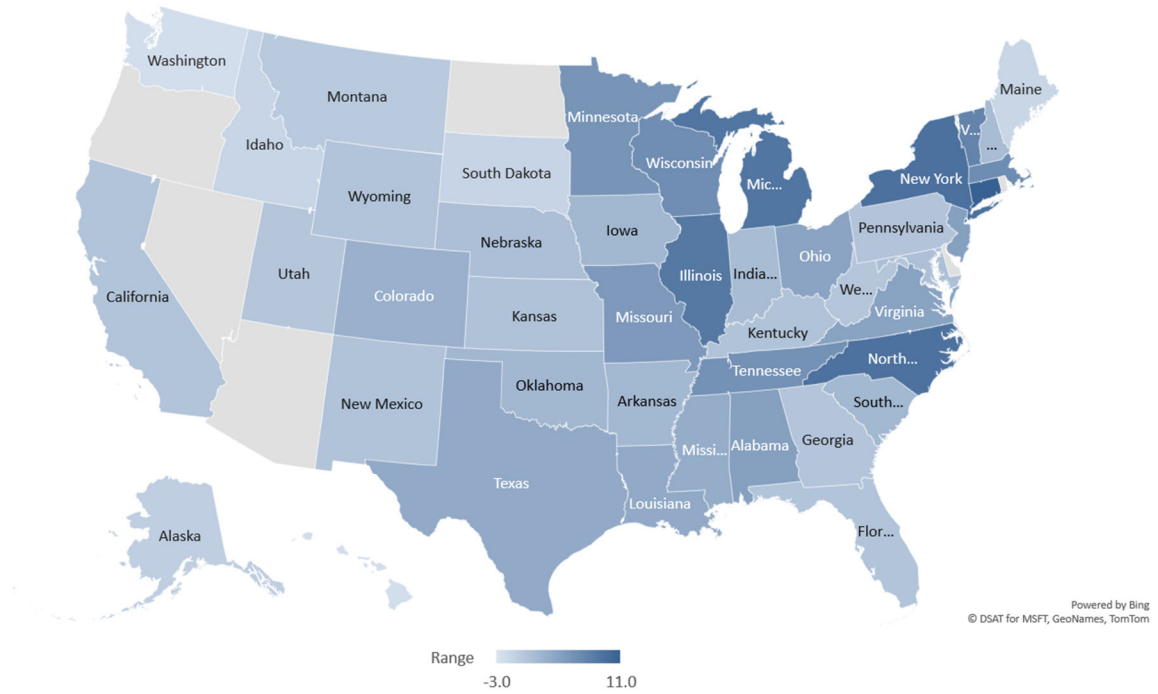

**Supplemental Material, p4.** Changes in HIV testing among non-dual eligible Medicaid enrollees with schizophrenia from 2002 to 2012

**Supplemental Material, p5.** Logistic Regression of HIV testing among Medicaid patients with schizophrenia, 2002 & 2012 (N = 603,340)

| Predictor Class                                    | Variable          | 2002<br>(n = 235,066) |         | 2012<br>(n = 368,274) |         |
|----------------------------------------------------|-------------------|-----------------------|---------|-----------------------|---------|
|                                                    |                   | OR (95% CI)           | P-value | OR (95% CI)           | P-value |
| <b>Demographics</b>                                |                   |                       |         |                       |         |
| <i>Sex</i>                                         | Female            | 1.59 (1.52, 1.66)     | <.000   | 1.71 (1.66, 1.75)     | <.000   |
|                                                    | Male (REF)        | 1.00                  |         | 1.00                  |         |
| <i>Race/ethnicity</i>                              | Black             | 1.40 (1.33, 1.46)     | <.000   | 2.12 (2.05, 2.18)     | <.000   |
|                                                    | AI/AN             | 0.87 (0.67, 1.13)     | 0.293   | 0.95 (0.81, 1.11)     | 0.502   |
|                                                    | Asian/PI          | 0.42 (0.32, 0.55)     | <.000   | 1.08 (0.97, 1.20)     | 0.158   |
|                                                    | Hispanic/Latino   | 1.55 (1.45, 1.65)     | <.000   | 2.00 (1.92, 2.08)     | <.000   |
|                                                    | NHOPI             | 0.97 (0.82, 1.16)     | 0.772   | 0.79 (0.68, 0.91)     | <.000   |
|                                                    | Multiracial       | 0.91 (0.56, 1.48)     | 0.711   | 1.90 (1.58, 2.27)     | 0.001   |
|                                                    | Unknown           | 1.18 (1.09, 1.27)     | <.000   | 1.28 (1.22, 1.34)     | <.000   |
|                                                    | White (REF)       | 1.00                  |         | 1.00                  |         |
| <i>Age</i>                                         | 15-19             | 4.32 (3.68, 5.07)     | <.000   | 3.01 (2.77, 3.27)     | <.000   |
|                                                    | 20-29             | 4.74 (4.14, 5.44)     | <.000   | 3.58 (3.37, 3.82)     | <.000   |
|                                                    | 30-39             | 3.78 (3.32, 4.32)     | <.000   | 2.74 (2.57, 2.92)     | <.000   |
|                                                    | 40-49             | 2.90 (2.55, 3.30)     | <.000   | 2.15 (2.02, 2.29)     | <.000   |
|                                                    | 50-59             | 1.76 (1.54, 2.02)     | <.000   | 1.53 (1.44, 1.62)     | <.000   |
|                                                    | 60-64 (REF)       | 1.00                  |         | 1.00                  |         |
| <i>Comorbidities<sup>a</sup><br/>Substance Use</i> | Alcohol           | 1.23 (1.15, 1.32)     | <.000   | 1.28 (1.23, 1.33)     | <.000   |
|                                                    | Opioid            | 1.18 (1.07, 1.31)     | 0.001   | 1.24 (1.18, 1.31)     | <.000   |
|                                                    | Cocaine           | 1.32 (1.22, 1.44)     | <.000   | 1.34 (1.27, 1.41)     | <.000   |
|                                                    | Amphetamine       | 1.54 (1.30, 1.83)     | <.000   | 1.08 (0.98, 1.18)     | 0.107   |
|                                                    | Cannabis          | 0.92 (0.83, 1.01)     | 0.095   | 1.12 (1.07, 1.17)     | <.000   |
|                                                    | Other             | 1.57 (1.47, 1.69)     | <.000   | 1.47 (1.41, 1.53)     | <.000   |
|                                                    | None (REF)        | 1.00                  |         | 1.00                  |         |
| <i>Psychiatric</i>                                 | Anxiety           | 1.35 (1.27, 1.44)     | <.000   | 1.14 (1.10, 1.18)     | <.000   |
|                                                    | Depression        | 1.36 (1.30, 1.42)     | <.000   | 1.28 (1.25, 1.32)     | <.000   |
|                                                    | None (REF)        | 1.00                  |         | 1.00                  |         |
| <i>Medical</i>                                     | Hepatitis B       | 1.69 (1.43, 2.01)     | <.000   | 2.04 (1.80, 2.31)     | <.000   |
|                                                    | Hepatitis C       | 3.51 (3.24, 3.81)     | <.000   | 2.70 (2.56, 2.84)     | <.000   |
|                                                    | Diabetes Mellitus | 0.96 (0.91, 1.02)     | 0.215   | 1.00 (0.96, 1.03)     | 0.860   |
|                                                    | Hypertension      | 1.13 (1.08, 1.19)     | <.000   | 1.10 (1.06, 1.13)     | <.000   |
|                                                    | Dyslipidemia      | 1.46 (1.38, 1.54)     | <.000   | 1.27 (1.23, 1.31)     | <.000   |
|                                                    | None (REF)        | 1.00                  |         | 1.00                  |         |
| <i>STI</i>                                         | HSV               | 3.39 (2.94, 3.90)     | <.000   | 3.44 (3.18, 3.71)     | <.000   |
|                                                    | Chlamydia         | 2.78 (2.06, 3.76)     | <.000   | 4.64 (3.97, 5.42)     | <.000   |
|                                                    | Syphilis          | 3.79 (3.12, 4.60)     | <.000   | 3.28 (2.82, 3.82)     | <.000   |
|                                                    | Gonococcal        | 2.34 (1.78, 3.08)     | <.000   | 3.53 (2.90, 4.30)     | <.000   |
|                                                    | None (REF)        | 1.00                  |         | 1.00                  |         |

Abbreviations: AI/AN = American Indian/Alaskan Native; PI = Pacific Islander; NHOPI = Native Hawaiian/Other Pacific Islander; OR = odds ratio; CI = confidence interval; STI = sexually transmitted infection; REF = reference group.

Estimates are adjusted for race/ethnicity, age, gender, and comorbidities (substance use, psychiatric, medical).

<sup>a</sup>Respective comorbid reference group includes those who do not have the condition.

**Supplemental Material, p6.** Sensitivity analysis: Logistic regression of HIV testing among Medicaid patients with schizophrenia adjusted for any annual medical visit, 2002 & 2012 ( $N = 603,340$ )

| Predictor Class                                    | Variable          | 2002<br>( $n = 235,066$ ) |         | 2012<br>( $n = 368,274$ ) |         |
|----------------------------------------------------|-------------------|---------------------------|---------|---------------------------|---------|
|                                                    |                   | OR (95% CI)               | P-value | OR (95% CI)               | P-value |
| <b>Demographics</b>                                |                   |                           |         |                           |         |
| <i>Sex</i>                                         | Female            | 1.42 (1.36, 1.48)         | <.000   | 1.54 (1.50, 1.58)         | <.000   |
|                                                    | Male (REF)        | 1.00                      |         | 1.00                      |         |
| <i>Race/ethnicity</i>                              | Black             | 1.53 (1.46, 1.60)         | <.000   | 2.25 (2.18, 2.32)         | <.000   |
|                                                    | AI/AN             | 0.90 (0.70, 1.17)         | 0.448   | 0.94 (0.81, 1.10)         | 0.453   |
|                                                    | Asian/PI          | 0.44 (0.34, 0.57)         | <.000   | 1.14 (1.03, 1.27)         | 0.012   |
|                                                    | Hispanic/Latino   | 1.69 (1.58, 1.81)         | <.000   | 2.08 (2.00, 2.16)         | <.000   |
|                                                    | NHOPI             | 0.97 (0.82, 1.16)         | 0.749   | 0.91 (0.79, 1.05)         | 0.216   |
|                                                    | Multiracial       | 1.07 (0.66, 1.75)         | 0.775   | 1.85 (1.54, 2.21)         | <.000   |
|                                                    | Unknown           | 1.24 (1.15, 1.34)         | <.000   | 1.32 (1.26, 1.39)         | <.000   |
|                                                    | White (REF)       | 1.00                      |         | 1.00                      |         |
| <i>Age</i>                                         | 15-19             | 4.00 (3.40, 4.69)         | <.000   | 2.77 (2.55, 3.01)         | <.000   |
|                                                    | 20-29             | 4.60 (4.02, 5.27)         | <.000   | 3.53 (3.32, 3.76)         | <.000   |
|                                                    | 30-39             | 3.66 (3.21, 4.18)         | <.000   | 2.68 (2.52, 2.86)         | <.000   |
|                                                    | 40-49             | 2.80 (2.46, 3.19)         | <.000   | 2.09 (1.97, 2.22)         | <.000   |
|                                                    | 50-59             | 1.73 (1.51, 1.97)         | <.000   | 1.50 (1.41, 1.59)         | <.000   |
|                                                    | 60-64 (REF)       | 1.00                      |         | 1.00                      |         |
| Outpatient Non-psychiatric Medical Visit           | One or more       | 2.69 (2.55, 2.83)         | <.000   | 3.10 (2.99, 3.22)         | <.000   |
|                                                    | None (REF)        | 1.00                      |         | 1.00                      |         |
| Comorbidities <sup>a</sup><br><i>Substance Use</i> | Alcohol           | 1.25 (1.17, 1.34)         | <.000   | 1.30 (1.25, 1.35)         | <.000   |
|                                                    | Opioid            | 1.27 (1.14, 1.40)         | <.000   | 1.23 (1.17, 1.30)         | <.000   |
|                                                    | Cocaine           | 1.39 (1.27, 1.51)         | <.000   | 1.37 (1.30, 1.44)         | <.000   |
|                                                    | Cannabis          | 1.49 (1.25, 1.77)         | <.000   | 1.13 (1.03, 1.24)         | 0.010   |
|                                                    | Other             | 0.93 (0.85, 1.03)         | 0.187   | 1.47 (1.41, 1.53)         | <.000   |
|                                                    | None (REF)        | 1.59 (1.48, 1.71)         | <.000   | 1.50 (1.44, 1.56)         | <.000   |
|                                                    |                   | 1.00                      |         | 1.00                      |         |
| <i>Psychiatric</i>                                 | Anxiety           |                           |         |                           |         |
|                                                    | Depression        | 1.24 (1.17, 1.32)         | <.000   | 1.06 (1.03, 1.10)         | <.000   |
|                                                    | None (REF)        | 1.31 (1.25, 1.37)         | <.000   | 1.23 (1.19, 1.26)         | <.000   |
|                                                    | 1.00              |                           | 1.00    |                           |         |
| <i>Medical</i>                                     | Hepatitis B       |                           |         |                           |         |
|                                                    | Hepatitis C       | 1.69 (1.43, 2.01)         | <.000   | 1.71 (1.45, 2.03)         | <.000   |
|                                                    | Diabetes Mellitus | 3.24 (2.99, 3.51)         | <.000   | 2.48 (2.36, 2.61)         | <.000   |
|                                                    | Hypertension      | 0.90 (0.85, 0.95)         | <.000   | 0.94 (0.91, 0.98)         | 0.001   |
|                                                    | Dyslipidemia      | 1.01 (0.96, 1.06)         | 0.623   | 0.98 (0.95, 1.01)         | 0.126   |
|                                                    | None (REF)        | 1.32 (1.25, 1.39)         | <.000   | 1.13 (1.10, 1.17)         | <.000   |
|                                                    |                   | 1.00                      |         | 1.00                      |         |
| <i>STI</i>                                         | HSV               |                           |         |                           |         |
|                                                    | Chlamydia         | 3.12 (2.71, 3.60)         | <.000   | 3.11 (2.88, 3.36)         | <.000   |
|                                                    | Syphilis          | 2.53 (1.88, 3.41)         | <.000   | 4.15 (3.56, 4.84)         | <.000   |
|                                                    | Gonococcal        | 3.70 (3.05, 4.50)         | <.000   | 3.23 (2.78, 3.75)         | <.000   |
|                                                    | None (REF)        | 1.00                      |         | 1.00                      |         |

*Abbreviations: AI/AN = American Indian/Alaskan Native; PI = Pacific Islander; NHOPI = Native Hawaiian/Other Pacific Islander; OR = odds ratio; CI = confidence interval; STI = sexually transmitted infection; REF = reference group.*

*Estimates are adjusted for race/ethnicity, age, gender, and comorbidities (substance use, psychiatric, medical).*

*<sup>a</sup>Respective comorbid reference group includes those who do not have the condition.*

**Supplemental Material, p7.** Sensitivity Analysis: Adjusted logistic regression of HIV testing among Medicaid patients by schizophrenia status, 2012 (N = 854,589)

| Model Class       | Adjusted Models        | Cases vs. Controls    |                    |       |
|-------------------|------------------------|-----------------------|--------------------|-------|
|                   |                        | OR (95% CI)           | P-value            |       |
| <i>Nested</i>     | Model 1 (Minimal)      | 1.23 (1.52, 1.66)     | <.000              |       |
|                   | Model 2 (Full)         | 0.94 (0.93, 0.96)     | <.000              |       |
|                   | Model 2 minus STI      | 0.94 (0.93, 0.96)     | <.000              |       |
|                   | Model 2 minus SUD      | 1.01 (0.99, 1.03)     | 0.221              |       |
|                   | Model 2 minus STI, SUD | 0.96 (0.94, 0.98)     | <.000              |       |
| <i>Restricted</i> |                        | Adj. Testing Rate (%) | P-value            |       |
|                   | Without STI            | Control               | 7.3% (7.2, 7.3)    | <.000 |
|                   |                        | Case                  | 6.9% (6.8, 7.0)    | <.000 |
|                   |                        | Difference            | -0.3% (-0.4, -0.2) | <.000 |
|                   | Without SUD            | Control               | 6.9% (6.8, 7.0)    | <.000 |
|                   |                        | Case                  | 6.3% (6.3, 6.4)    | <.000 |
|                   |                        | Difference            | -0.5 (-0.7, -0.4)  | <.000 |
|                   | Without STI, SUD       | Control               | 6.4% (6.3, 6.5)    | <.000 |
|                   |                        | Case                  | 6.2% (6.1, 6.3)    | <.000 |
|                   |                        | Difference            | -0.2% (-0.3, -0.1) | <.000 |

*Abbreviations: STI=sexually transmitted infection; SUD=substance use disorders; OR=odds ratio; CI=confidence intervals; Adj=adjusted. Model 1 is minimally adjusted for age, sex, race/ethnicity. Model 2 includes Model 1 plus comorbidities (STIs, SUD, medical, psychiatric).*
